# Supplementary material
Source: PubMed Central journal article supplement (PMC10079615)
Supplement: NIHMS1873137-supplement-Supplemental_Table_1.pdf [file NIHMS1873137-supplement-Supplemental_Table_1.pdf]

**Supplemental Table 1. Associations between (a) usual source of care and (b) delay in care and cumulative enforcement experiences, net years living in the US and other covariates**

|                                           | <b>(a) Usual source of care*</b> |           | <b>(b) Delay in care*</b> |           |
|-------------------------------------------|----------------------------------|-----------|---------------------------|-----------|
|                                           | Model 1<br>AOR                   | 95% CI    | Model 1<br>AOR            | 95% CI    |
| <b>Cumulative enforcement experiences</b> | 0.91                             | 0.8 - 1.1 | 1.30*                     | 1.1 - 1.5 |
| <b>Asian/Latinx</b>                       |                                  |           |                           |           |
| Latinx                                    | 0.77                             | 0.5 - 1.1 | 0.83                      | 0.6 - 1.2 |
| Asian                                     | (ref)                            |           | (ref)                     |           |
| <b>Citizenship status</b>                 |                                  |           |                           |           |
| Noncitizen non-green card holder          | 0.73                             | 0.5 - 1.1 | 0.82                      | 0.5 - 1.3 |
| Noncitizen green card holder              | 0.79                             | 0.5 - 1.3 | 0.77                      | 0.5 - 1.3 |
| Naturalized citizen                       | (ref)                            |           | (ref)                     |           |
| <b>Years living in the US</b>             |                                  |           |                           |           |
| <1 year                                   | 1.58                             | 0.6 - 3.9 | 0.88                      | 0.2 - 3.3 |
| 2-4 years                                 | 2.50                             | 1.0 - 6.0 | 2.01                      | 0.7 - 6.0 |
| 5-9 years                                 | 1.68                             | 0.7 - 3.9 | 1.01                      | 0.3 - 3.1 |
| 10-14 years                               | 2.72                             | 1.2 - 5.9 | 1.65                      | 0.6 - 4.7 |
| 15+ years                                 | (ref)                            |           | (ref)                     |           |
| <b>Age</b>                                | 1.03*                            | 1.0 - 1.0 | 0.98*                     | 1.0 - 1.0 |
| <b>Sex</b>                                |                                  |           |                           |           |
| Female                                    | 1.74*                            | 1.3 - 2.4 | 1.77*                     | 1.3 - 2.5 |
| Male                                      | (ref)                            |           | (ref)                     |           |
| <b>Education Level</b>                    |                                  |           |                           |           |
| High school graduation or higher          | 1.80*                            | 1.2 - 2.6 | 1.44                      | 1.0 - 2.2 |
| No high school graduation                 | (ref)                            |           | (ref)                     |           |
| <b>Employment status</b>                  |                                  |           |                           |           |
| Employed                                  | 0.86                             | 0.4 - 1.8 | 0.82                      | 0.4 - 1.6 |
| Out of labor force                        | 0.68                             | 0.3 - 1.5 | 0.48                      | 0.2 - 1.0 |
| Unemployed                                | (ref)                            |           | (ref)                     |           |
| <b>Poverty level</b>                      |                                  |           |                           |           |
| Below 200% Federal Poverty Level          | 0.90                             | 0.6 - 1.3 | 1.17                      | 0.8 - 1.7 |
| At 200% Federal Poverty Level and above   | (ref)                            |           | (ref)                     |           |
| <b>Uninsured</b>                          |                                  |           |                           |           |
| Yes                                       | 0.23*                            | 0.2 - 0.3 | 1.23                      | 0.8 - 1.8 |
| No                                        | (ref)                            |           | (ref)                     |           |
| <b>Self-rated health</b>                  |                                  |           |                           |           |
| Excellent                                 | 0.72                             | 0.4 - 1.2 | 0.32*                     | 0.2 - 0.6 |
| Very good                                 | 0.92                             | 0.6 - 1.5 | 0.34*                     | 0.2 - 0.6 |
| Good                                      | 0.92                             | 0.6 - 1.4 | 0.70*                     | 0.5 - 1.0 |
| Fair/poor                                 | (ref)                            |           | (ref)                     |           |
| <b>Usual source of care</b>               |                                  |           |                           |           |
| Yes                                       |                                  |           | 0.58*                     | 0.4 - 0.9 |
| No                                        |                                  |           | (ref)                     |           |

**Source:** RIGHTS Study and CHIS, 2018 and 2019 (n=1681)

Analyses weighted

\* p<0.05
