# Supplementary material
Source: PubMed Central journal article supplement (PMC10079615)
Supplement: NIHMS1873137-supplement-Supplemental_Table_2.pdf [file NIHMS1873137-supplement-Supplemental_Table_2.pdf]

**Supplemental Table 2. Associations between (a) usual source of care and (b) delay in care and the interaction of cumulative enforcement experiences and citizenship status**

|                                                                | <b>(a) Usual source of care*</b> |           | <b>(b) Delay in care*</b> |           |
|----------------------------------------------------------------|----------------------------------|-----------|---------------------------|-----------|
|                                                                | AOR                              | 95% CI    | AOR                       | 95% CI    |
| <b>Cumulative enforcement experiences</b>                      | 0.84                             | 0.7 - 1.0 | 1.28                      | 1.1 - 1.5 |
| <b>Asian/Latinx</b>                                            |                                  |           |                           |           |
| Latinx                                                         | 0.87                             | 0.6 - 1.3 | 0.83                      | 0.6 - 1.2 |
| Asian                                                          | (ref)                            |           | (ref)                     |           |
| <b>Citizenship status</b>                                      |                                  |           |                           |           |
| Noncitizen non-green card holder                               | 0.64                             | 0.4 - 1.0 | 0.59                      | 0.3 - 1   |
| Noncitizen green card holder                                   | 0.45*                            | 0.3 - 0.8 | 0.83                      | 0.5 - 1.2 |
| Naturalized citizen                                            | (ref)                            |           | (ref)                     |           |
| <b>Age</b>                                                     | 1.02*                            | 1.0 - 1.0 | 0.98*                     | 1 - 1     |
| <b>Sex</b>                                                     |                                  |           |                           |           |
| Female                                                         | 1.73*                            | 1.3 - 2.4 | 1.76*                     | 1.3 - 2.4 |
| Male                                                           | (ref)                            |           | (ref)                     |           |
| <b>Education Level</b>                                         |                                  |           |                           |           |
| High school graduation or higher                               | 1.79*                            | 1.2 - 2.6 | 1.43                      | 0.9 - 2.2 |
| No high school graduation                                      | (ref)                            |           | (ref)                     |           |
| <b>Employment status</b>                                       |                                  |           |                           |           |
| Employed                                                       | 1.02                             | 0.5 - 2.1 | 0.85                      | 0.4 - 1.7 |
| Out of labor force                                             | 0.81                             | 0.4 - 1.7 | 0.48*                     | 0.2 - 1.0 |
| Unemployed                                                     | (ref)                            |           | (ref)                     |           |
| <b>Poverty level</b>                                           |                                  |           |                           |           |
| Below 200% Federal Poverty Level                               | 0.87                             | 0.6 - 1.2 | 1.2                       | 0.8 - 1.7 |
| At 200% Federal Poverty Level and above                        | (ref)                            |           | (ref)                     |           |
| <b>Uninsured</b>                                               |                                  |           |                           |           |
| Yes                                                            | 0.23*                            | 0.2 - 0.3 | 1.3                       | 0.8 - 1.9 |
| No                                                             | (ref)                            |           | (ref)                     |           |
| <b>Self-rated health</b>                                       |                                  |           |                           |           |
| Excellent                                                      | 0.67                             | 0.4 - 1.1 | 0.30*                     | 0.2 - 0.6 |
| Very good                                                      | 0.88                             | 0.5 - 1.4 | 0.35*                     | 0.2 - 0.6 |
| Good                                                           | 0.86                             | 0.6 - 1.3 | 0.69*                     | 0.5 - 1.0 |
| Fair/poor                                                      | (ref)                            |           | (ref)                     |           |
| <b>Usual source of care</b>                                    |                                  |           |                           |           |
| Yes                                                            | -                                |           | 0.61*                     | 0.4 - 0.9 |
| No                                                             | -                                |           | (ref)                     |           |
| <b>Cumulative enforcement experiences X Citizenship status</b> |                                  |           |                           |           |
| Noncitizen non-green card holder X Experiences of Enforcement  | 1.0                              | 0.8 - 1.3 | 1.2                       | 0.9 - 1.7 |
| Noncitizen green card holder X Experiences of Enforcement      | 1.4                              | 1.0 - 1.8 | 0.8                       | 0.5 - 1.5 |
| Naturalized X Experiences of Enforcement                       | (ref)                            |           | (ref)                     |           |

**Source:** RIGHTS Study and CHIS, 2018 and 2019 (n=1681)

Analyses weighted

\* p<0.05
